# Supplementary material
Source: PubMed Central journal article supplement (PMC5360879)
Supplement: cmi201581x1.pdf [file cmi201581x1.pdf]

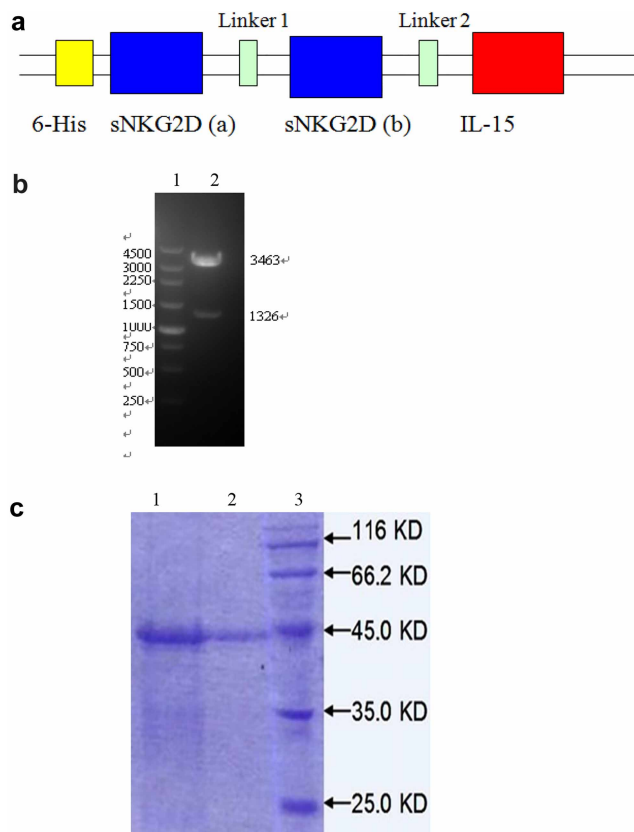

**Supplementary Figure 1** Generation of the human dsNKG2D-IL-15 fusion protein. **(a)** Schematic representation of the cloning strategy and domain assembly for scFv-GM-CSF fusion proteins. **(b)** The recombinant human dsNKG2D-IL-15 was digested by *Bam*H I and *Hind* III restrictive enzymes, and the results of electrophoresis are shown. **(c)** SDS-PAGE of the purified recombinant human dsNKG2D-IL-15 protein. Lane 1, denatured dsNKG2D-IL-15; Lane 2, renatured dsNKG2D-IL-15; Lane 3, Standard protein marker.

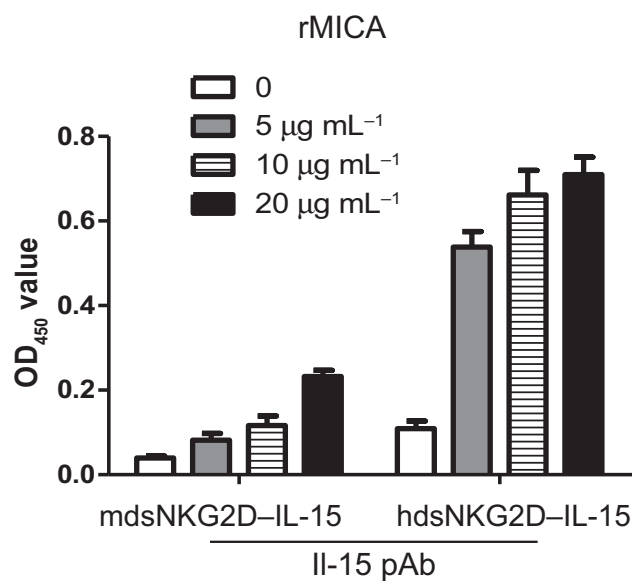

**Supplementary Figure 2** Soluble MICA protein (1 µg) was coated on wells. Human or mouse dsNKG2D-IL-15 was added and incubated at 37°C for 1 h. Polyclonal antibody against both human and mouse IL-15, and HRP-secondary antibodies were added sequentially into the wells. OD<sub>450</sub> value of each well was read after adding the substrate and stop solution.

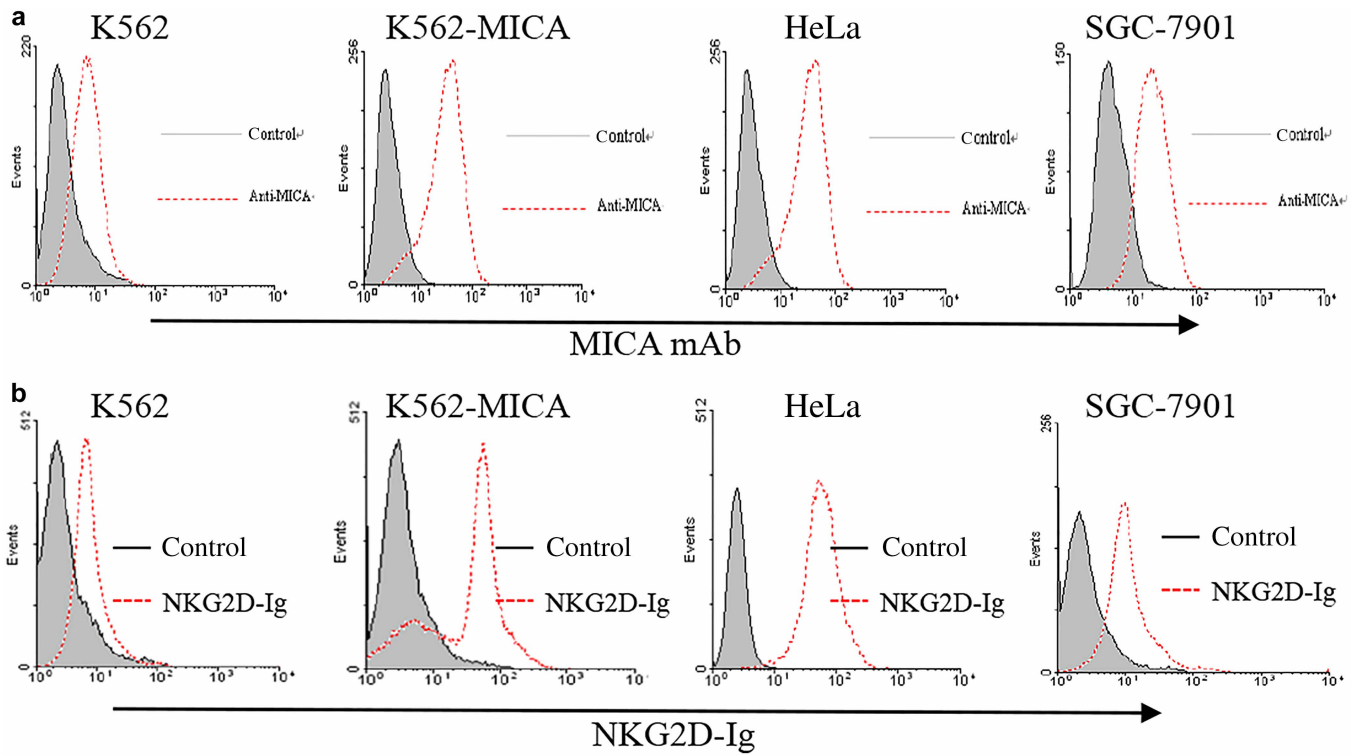

**Supplementary Figure 3** Expression of MICA and NKG2D ligands on tumor cells. (a) MICA on K562, K562-MICA, HeLa, SGC-7901 cells is stained by MICA mAb. Gray area: Isotype antibody staining; red line: MICA mAb staining. (b) Total NKG2D ligands on K562, K562-MICA, HeLa, SGC-7901 cells are confirmed by staining with commercial recombinant NKG2D-Ig fusion protein and detected by goat anti-human IgG antibody. Gray area: Isotype antibody staining; red line: NKG2D-Ig staining.

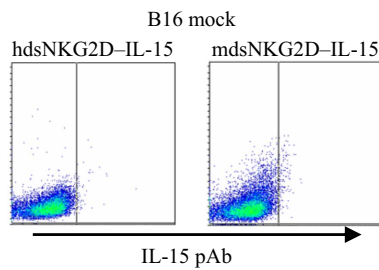

**Supplementary Figure 4** Binding of human or mouse dsNKG2D-IL-15 with mock-transfected B16 cells. Cells were incubated with human or mouse dsNKG2D-IL-15 for 30 min, then stained by rabbit anti-human and mouse IL-15 polyclonal antibody and fluorescent secondary goat anti-rabbit antibody.

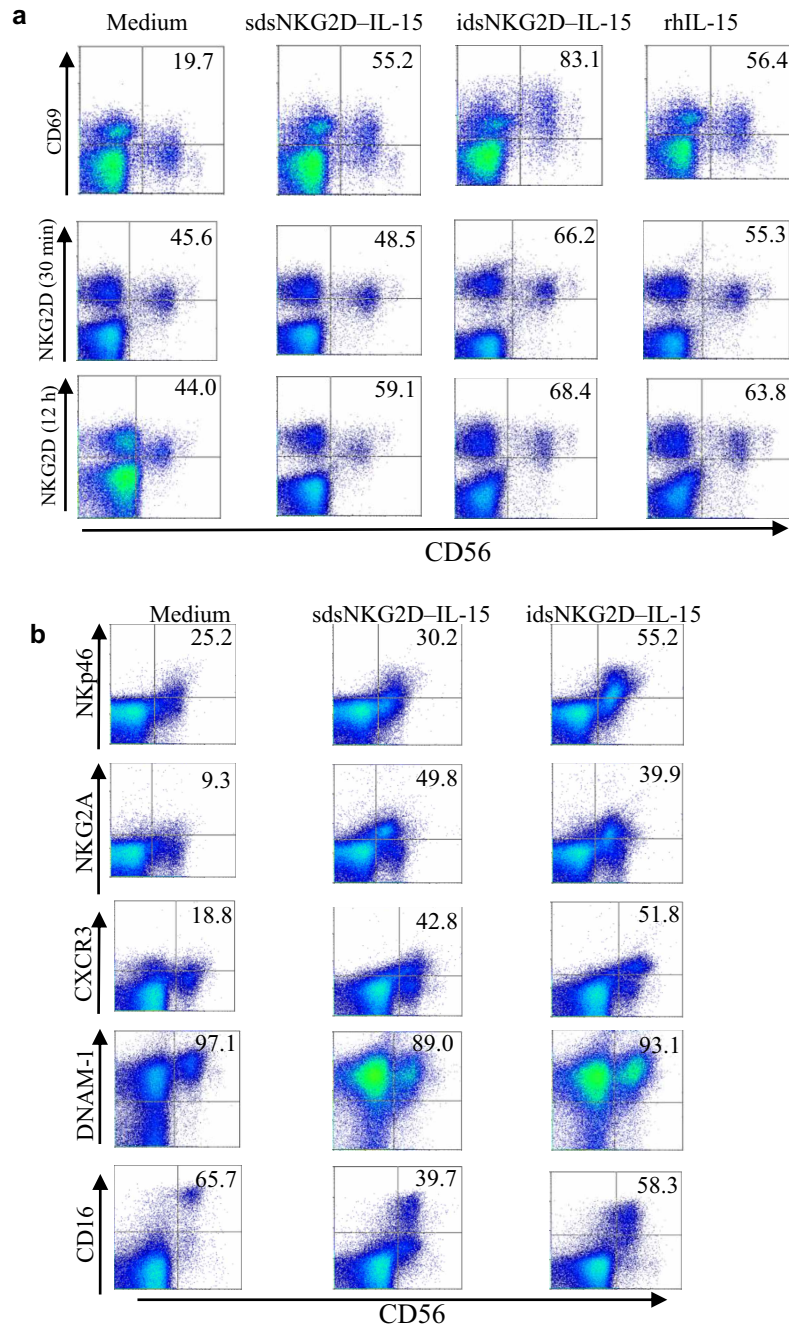

**Supplementary Figure 5** Representative results of receptor expression on CD56<sup>+</sup> cells after stimulations with soluble or immobilized dsNKG2D-IL-15. **(a)** CD69 or NKG2D expression. **(b)** Nkp46, NKG2A, CXCR3, DNAM-1, CD16 expression.

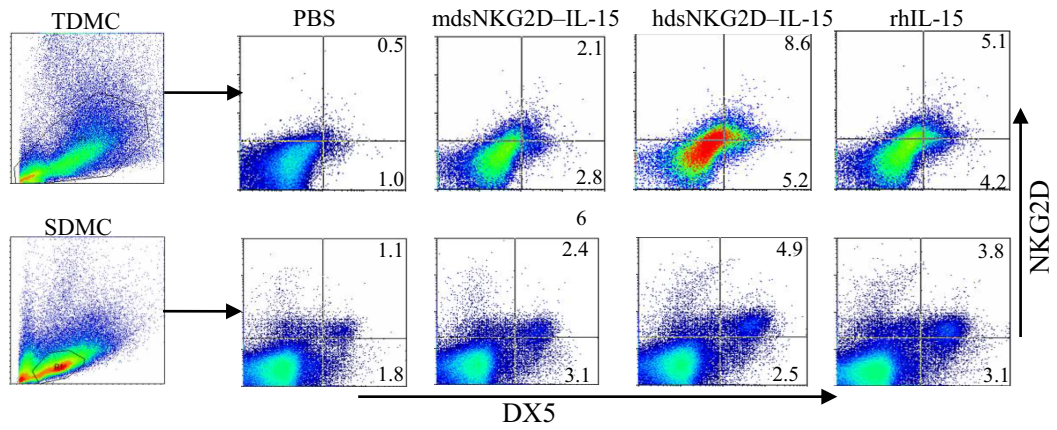

**Supplementary Figure 6** Representative results of NK cell frequencies in tumor tissue and spleen of SGC-7901 cell-transplanted tumor mice treated by human dsNKG2D-IL-15, mouse dsNKG2D-IL-15, or recombinant human IL-15. Upper panel: tumor-derived mononuclear cells (TDMC); lower panel: splenic mononuclear cells (SDMC). NK cell frequency is calculated by total frequencies of upper right quadrant and lower right quadrant. Frequency of NKG2D<sup>+</sup>DX5<sup>+</sup> cells is from frequency of upper right quadrant divided by total NK cell frequency.

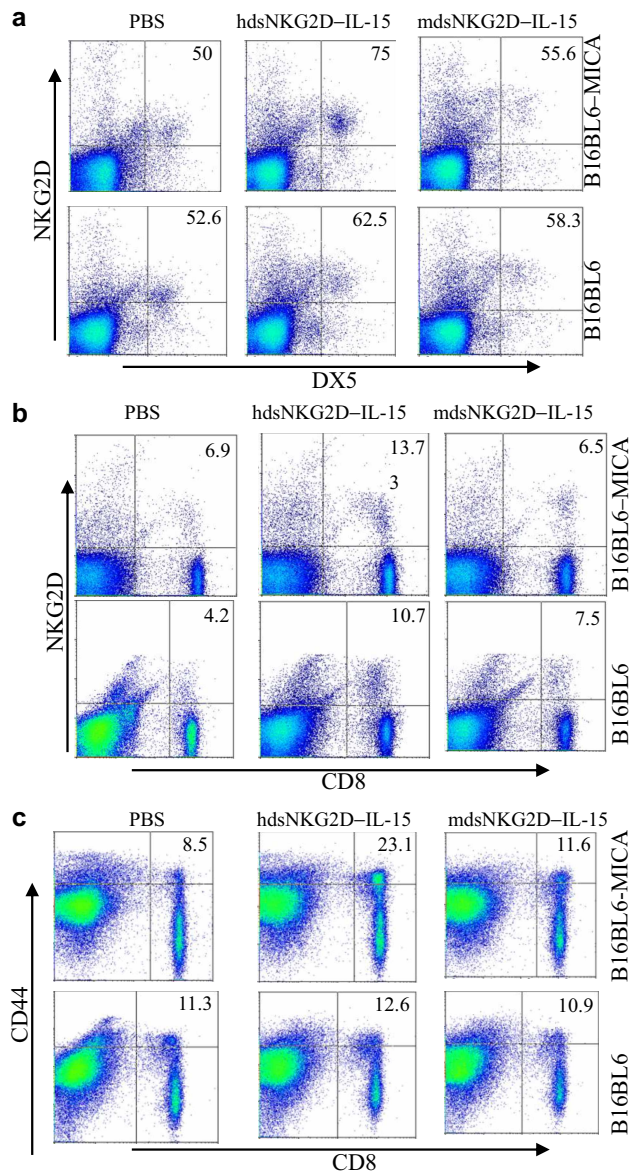

**Supplementary Figure 7** Representative results of NK and CD8<sup>+</sup> T-cell frequencies in spleen of mice transplanted with B16-MICA or B16 cells treated by human or mouse dsNKG2D-IL-15. **(a)** Variations of NKG2D<sup>+</sup>DX5<sup>+</sup> cells. **(b)** Variations of NKG2D<sup>+</sup>CD8<sup>+</sup> cells. **(c)** Variations of CD44<sup>+</sup>CD8<sup>+</sup> cells. Numbers indicate upper right quadrant divided by sum of upper right quadrant and lower right quadrant.
